# Supplementary material
Source: publisher figshare collection journal article supplement (https://frontiersin.figshare.com/ndownloader/files/31776869)
Supplement: Supplementary file 1 [file 31776869]

### Supplementary appendix C

**Table C1** | The pre and post-treatment mean sapling densities ha<sup>-1</sup> of the two woody species in the bush control treatment plots in Borana, southern Ethiopia

| Treatment plot | <i>A. mellifera</i> |                | <i>A. reficiens</i> |                |
|----------------|---------------------|----------------|---------------------|----------------|
|                | Pre-treatment       | Post-treatment | Pre-treatment       | Post-treatment |
| <b>CO</b>      | 83                  | 47             | 44                  | 62             |
| <b>BC</b>      | 86                  | 148            | 32                  | 119            |
| <b>T</b>       | 80                  | 104            | 39                  | 71             |
| <b>T+G</b>     | 88                  | 97             | 37                  | 49             |
| <b>T+B</b>     | 78                  | 37             | 43                  | 26             |
| <b>T+F</b>     | 81                  | 44             | 50                  | 38             |
| <b>T+F+B</b>   | 78                  | 21             | 46                  | 13             |

NB: CO = control, BC= bush clearing, T=thinning, T+G = thinning and grazing, T+B=thinning and browsing, T+F= thinning and fire, T+B+F =thinning, browsing and fire.
